# Supplementary material for: Ebola Virus Epidemiology and Evolution in Nigeria
Source: PubMed Central journal article supplement — J Infect Dis. 2016 Oct 4;214(Suppl 3):S102–9. doi: 10.1093/infdis/jiw190 (PMC5050462; doi:10.1093/infdis/jiw190), 2016-10-04
Supplement: supp_jiw190_jiw190supp_table1.pdf [file supp_jiw190_jiw190supp_table1.pdf]

| Symptom  |          | Survivor (n=12) | Dead (n=8) |
|----------|----------|-----------------|------------|
| Fever    | Positive | 11              | 6          |
|          | Negative | 1               | 2          |
| Fatigue  | Positive | 8               | 6          |
|          | Negative | 4               | 2          |
| Diarrhea | Positive | 7               | 6          |
|          | Negative | 5               | 2          |
| Anorexia | Positive | 9               | 2          |
|          | Negative | 3               | 6          |
| Vomiting | Positive | 5               | 5          |
|          | Negative | 7               | 3          |
| Headache | Positive | 4               | 2          |
|          | Negative | 8               | 6          |
| Bleeding | Positive | 2               | 4          |
|          | Negative | 10              | 4          |
