# Supplementary material for: Ebola Virus Epidemiology and Evolution in Nigeria
Source: PubMed Central journal article supplement — J Infect Dis. 2016 Oct 4;214(Suppl 3):S102–9. doi: 10.1093/infdis/jiw190 (PMC5050462; doi:10.1093/infdis/jiw190), 2016-10-04
Supplement: supp_jiw190_jiw190supp_table2.pdf [file supp_jiw190_jiw190supp_table2.pdf]

| Signs                   | Clinical Profile                       | Confirmed Cases (%) |
|-------------------------|----------------------------------------|---------------------|
| Pulse Rate (n=12)       | High (>100 beats/min)                  | 5 (42.7)            |
|                         | Normal (60-100 beats/min)              | 6 (50.0)            |
|                         | Low (<60 beats/min)                    | 1 (8.3)             |
| Respiratory Rate (n=10) | Fast (>20 beats/min)                   | 9 (90.0)            |
|                         | Normal (12-20 beats/min)               | 1 (10.0)            |
|                         | Slow (<12 beats/min)                   | 0 (0.0)             |
| Blood Pressure (n=11)   | High (Systolic > 120)                  | 2 (18.2)            |
|                         | Normal (Systolic 90-120)               | 6 (54.5)            |
|                         | Low (Systolic <90)                     | 3 (27.3)            |
| Syndromes (n=13)        | Disseminated Intravascular Coagulation | 1 (7.7)             |
|                         | Gastroenteritis                        | 9 (69.2)            |
|                         | Encephalopathy                         | 3 (23.1)            |
